# Supplementary material
Source: PubMed Central journal article supplement (PMC5839046)
Supplement: 41431_2017_86_MOESM5_ESM.pdf [file 41431_2017_86_MOESM5_ESM.pdf]

**Supplementary Table S4. MAF values and prediction for the missense and splicing variants**

| Gene        | Variant     | RefSeq                     | dbSNP ID    | MAF (ExAc)   | PolyPhen-2        | SIFT     | Scaled CADD score | Human splicing finder                                                |
|-------------|-------------|----------------------------|-------------|--------------|-------------------|----------|-------------------|----------------------------------------------------------------------|
| <i>OGG1</i> | c.923G>A    | NM_016829.2                | rs113561019 | A=0.0041/500 | probably damaging | damaging | 28.7              | /                                                                    |
| <i>EXO1</i> | c.2212-1G>C | NM_130398.3<br>NG_029100.1 | rs4150000   | C=0.0019/214 | /                 | /        | 16.82             | Alteration of the WT acceptor site, most probably affecting splicing |
| <i>POLQ</i> | c.6743A>G   | NM_199420.3                | rs376729696 | C=0.0001/16  | probably damaging | damaging | 24.4              | /                                                                    |

Legend: MAF: Minor Allele Frequency; CADD: Combined Annotation Dependent Depletion;  
Scaled CADD score threshold:  $\geq 10$  mildly damaging;  $\geq 20$  moderately damaging;  $\geq 30$  strongly damaging.
